# Supplementary material for: Aggregation-induced enhanced fluorescence emission of chiral Zn(ii) complexes coordinated by Schiff-base type binaphthyl ligands
Source: Royal Society of Chemistry journal article supplement (doi:10.1039/d4dt00903g), 2024-01-01
Supplement: d4dt00903g1.pdf [file d4dt00903g1.pdf]

## Supporting Information

### **Aggregation-Induced Enhanced Fluorescence Emission of Chiral Zn(II) complexes Coordinated by Schiff-Base Type Binaphthyl Ligands**

Daiki Tauchi,<sup>a</sup> Katsuya Kanno,<sup>a</sup> Masashi Hasegawa,<sup>b</sup> Yasuhiro Mazaki,<sup>b</sup> Kazunori Tsubaki,<sup>c</sup> Ken-ichi Sugiura,<sup>d</sup> Takuya Shiga,<sup>e</sup> Seiji Mori,<sup>a</sup> and Hiroyuki Nishikawa\*<sup>a</sup>

<sup>a</sup> Graduate School of Science and Engineering, Ibaraki University, 2-1-1 Bunkyo, Mito, Ibaraki 310-8512, Japan

E-mail: hiroyuki.nishikawa.sci@vc.ibaraki.ac.jp

<sup>b</sup> Graduate School of Science, Kitasato University, 1-15-1 Minami-Ku, Kitasato, Sagamihara, Kanagawa 252-0373, Japan

<sup>c</sup> Graduate School of Life and Environmental Science, Kyoto Prefectural University, 1-5 Sakyo-Ku, Kyoto 606-8522, Japan

<sup>d</sup> Graduate School of Science, Tokyo Metropolitan University, 1-1 Minami-Ohsawa, Hachioji, Tokyo, 192-0397, Japan

<sup>e</sup> Faculty of Pure and Applied Sciences, University of Tsukuba, 1-1-1 Tennodai, Tsukuba 305-8577, Japan

## Table of contents

|                                                                                                                                     |    |
|-------------------------------------------------------------------------------------------------------------------------------------|----|
| Synthetic procedure of the ligands .....                                                                                            | 3  |
| Figure S1. <sup>1</sup> H-NMR spectrum of <b><i>R-Zn</i></b> .....                                                                  | 4  |
| Figure S2. <sup>1</sup> H-NMR spectrum of <b><i>S-Zn</i></b> .....                                                                  | 5  |
| Figure S3. <sup>13</sup> C-NMR spectrum of <b><i>R-Zn</i></b> .....                                                                 | 6  |
| Figure S4. <sup>13</sup> C-NMR spectrum of <b><i>S-Zn</i></b> .....                                                                 | 6  |
| Figure S5. COSY and NOESY spectra of <b><i>R-Zn</i></b> .....                                                                       | 7  |
| Figure S6. COSY and NOESY spectra of <b><i>S-Zn</i></b> .....                                                                       | 8  |
| Figure S7. Crystal structure of <b><i>S-Zn</i></b> .....                                                                            | 9  |
| Figure S8. Absorption and emission spectra of <b><i>S-Zn</i></b> .....                                                              | 11 |
| Figure S9. Absorption spectra of <b><i>R-Zn</i></b> and <b><i>S-Zn</i></b> in 0.1 wt% KBr pellet .....                              | 12 |
| Figure S10. Emission decay profiles of <b><i>R-Zn</i></b> and <b><i>S-Zn</i></b> in CH <sub>2</sub> Cl <sub>2</sub> solutions ..... | 13 |
| Figure S11. Emission decay profiles of <b><i>R-Zn</i></b> and <b><i>S-Zn</i></b> in powders .....                                   | 13 |
| Figure S12. CD and UV-vis spectra of <b><i>R-Zn</i></b> and <b><i>S-Zn</i></b> in CH <sub>2</sub> Cl <sub>2</sub> solutions .....   | 14 |
| Figure S13. CPL spectra of <b><i>R-Zn</i></b> and <b><i>S-Zn</i></b> in CH <sub>2</sub> Cl <sub>2</sub> solutions and powders ..... | 15 |
| Figure S14. Simulated UV-vis and CD spectra from TD-DFT calculations .....                                                          | 17 |
| Figure S15. Molecular orbitals of <b><i>R-Zn</i></b> related to the excitation listed in Table S3 .....                             | 19 |
| Figure S16. Optimized molecular structures of <b><i>R-Zn</i></b> and <b><i>S-Zn</i></b> .....                                       | 20 |
| Table S1. Crystallographic data for <b><i>R-Zn</i></b> and <b><i>S-Zn</i></b> .....                                                 | 10 |
| Table S2. Spectroscopic data for <b><i>R-Zn</i></b> and <b><i>S-Zn</i></b> .....                                                    | 16 |
| Table S3. Selected TD-DFT calculated excitation energies for <b><i>R-Zn</i></b> .....                                               | 18 |
| Table S4. Cartesian coordinates of the optimized equilibrium structure of <b><i>R-Zn</i></b> .....                                  | 21 |

## Synthetic procedure of the ligands

The Schiff-base type chiral ligands were synthesized from commercially available BINOL as shown in Scheme 1 according to the previous report.<sup>1</sup>

### Scheme 1

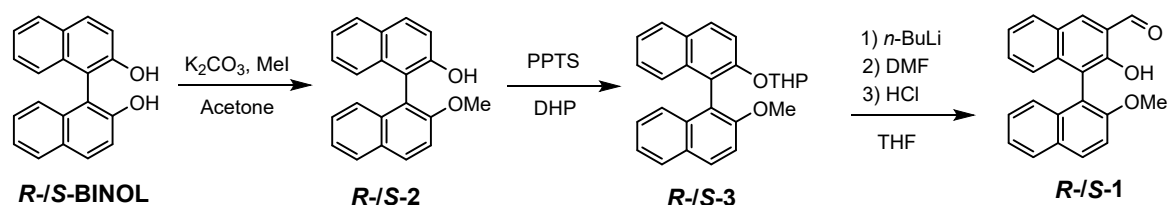

PPTS = pyridinium *p*-toluenesulfonate, DHP = 3,4-dihydro-2H-pyran

#### (R)-/(S)-2'-methoxy-[1,1'-binaphthalen]-2-ol (R/S-2)

**R-2**: <sup>1</sup>H-NMR (500 MHz, CDCl<sub>3</sub>): δ 8.07(1H, d), 7.92(2H, d), 7.86(1H, d), 7.50(1H, d), 7.39(2H, m), 7.30(2H, m), 7.21(1H, t), 7.17(1H, d), 7.05(1H, d), 4.93(1H, s), 3.82(3H, s)

**S-2**: <sup>1</sup>H-NMR (500 MHz, CDCl<sub>3</sub>): δ 8.07(1H, d), 7.92(2H, d), 7.86(1H, d), 7.50(1H, d), 7.40(2H, m), 7.30(2H, m), 7.21(1H, t), 7.17(1H, d), 7.05(1H, d), 4.95(1H, s), 3.83(3H, s)

#### (R)-/(S)-2-(2'-methoxy-[1,1'-binaphthalen]-2-yl)oxytetrahydro-2H-pyran (R/S-3)

**R-3**: <sup>1</sup>H-NMR (500 MHz, CDCl<sub>3</sub>): δ 7.96(2H, m), 7.87(2H, t), 7.59(1H, dd), 7.44(1H, m), 7.33(2H, m), 7.21(4H, m), 3.76(3H, s), 1.15-1.58(8H, m).

**S-3**: <sup>1</sup>H-NMR (500 MHz, CDCl<sub>3</sub>): δ 7.96(2H, m), 7.87(2H, t), 7.59(1H, dd), 7.44(1H, m), 7.33(2H, m), 7.21(4H, m), 3.74(3H, s), 1.13-1.60(8H, m).

#### (R)-/(S)-2-hydroxy-2'-methoxy-[1,1'-binaphthalene]-3-carbaldehyde (R/S-1)

**R-1**: <sup>1</sup>H-NMR (500 MHz, CDCl<sub>3</sub>): δ 10.47(1H, s), 10.19(1H, s), 8.32(1H, s), 8.03(1H, d), 7.99(1H, m), 7.89(1H, d), 7.49(1H, d), 7.38-7.33(3H, m), 7.26(1H, t), 7.17-7.12(2H, m), 3.81(3H, s)

**S-1**: <sup>1</sup>H-NMR (500 MHz, CDCl<sub>3</sub>): δ 10.48(1H, s), 10.20(1H, s), 8.33(1H, s), 8.03(1H, d), 7.99(1H, m), 7.89(1H, d), 7.49(1H, d), 7.39-7.33(3H, m), 7.26(1H, t), 7.18-7.12(2H, m), 3.81(3H, s)

- (a) L. Jin, Y. Huang, H. Jing, T. Chang and P. Yan, *Tetrahedron: Asymmetry*, 2008, **19**, 1947-1953; (b) F. Meng, Y. Li, W. Zhang, S. Li, Y. Quan and Y. Cheng, *Polym. Chem.*, 2017, **8**, 1555-1561.

(a)

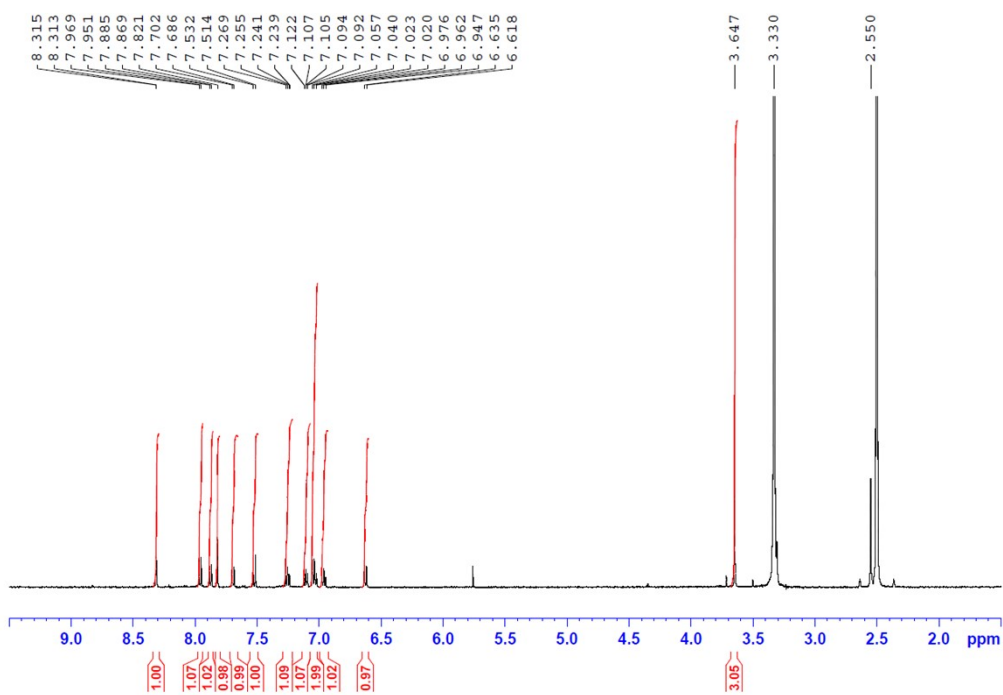

(b)

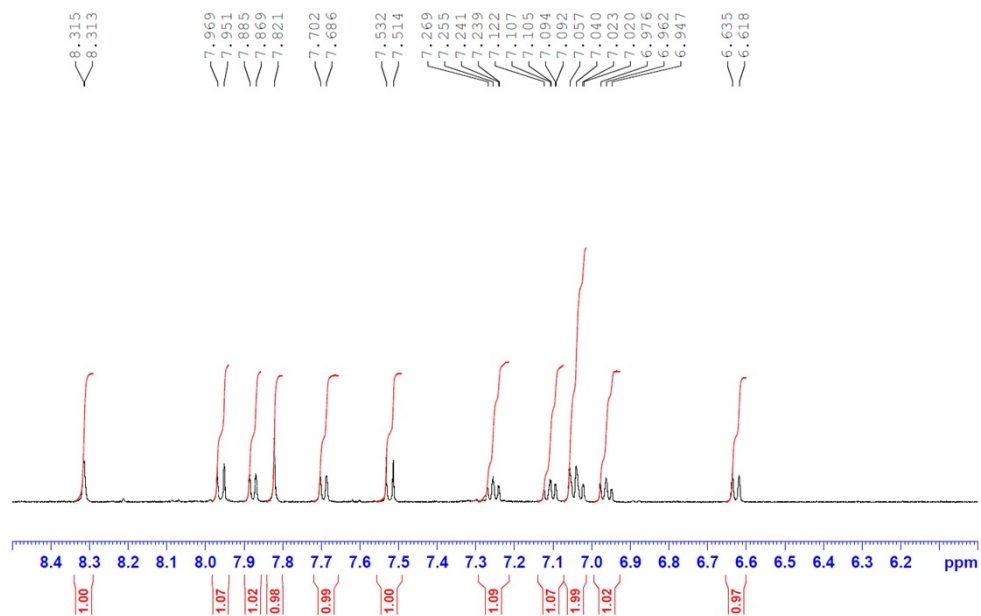

**Figure S1.** (a) <sup>1</sup>H-NMR spectrum of *R*-Zn (500 MHz, *d*<sub>6</sub>-DMSO, 298 K, Me<sub>4</sub>Si) and (b) expanded NMR spectrum of *R*-Zn.

(a)

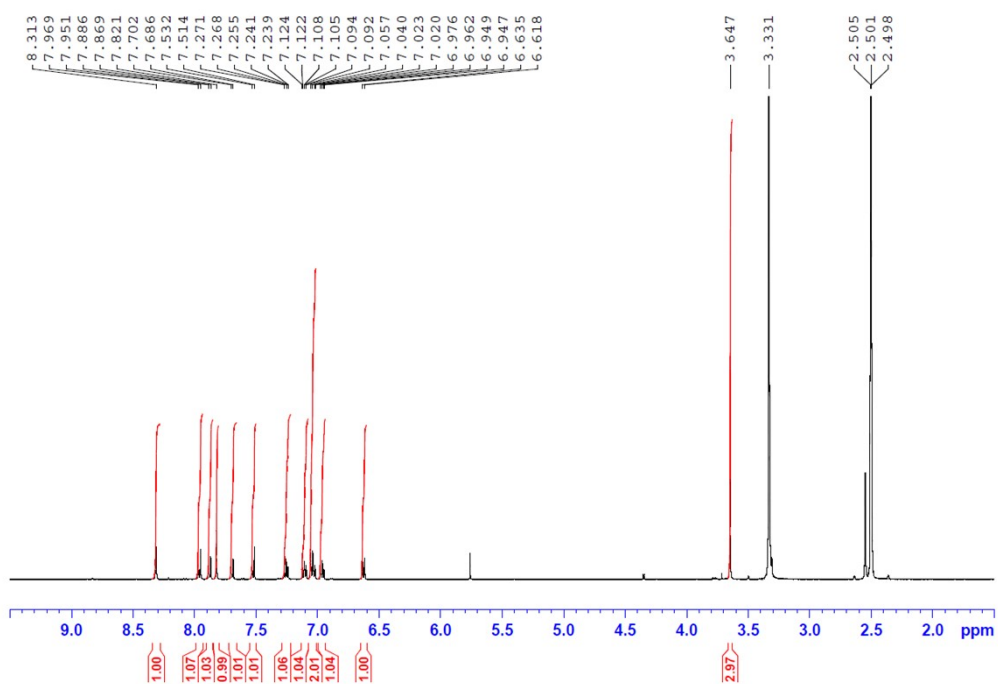

(b)

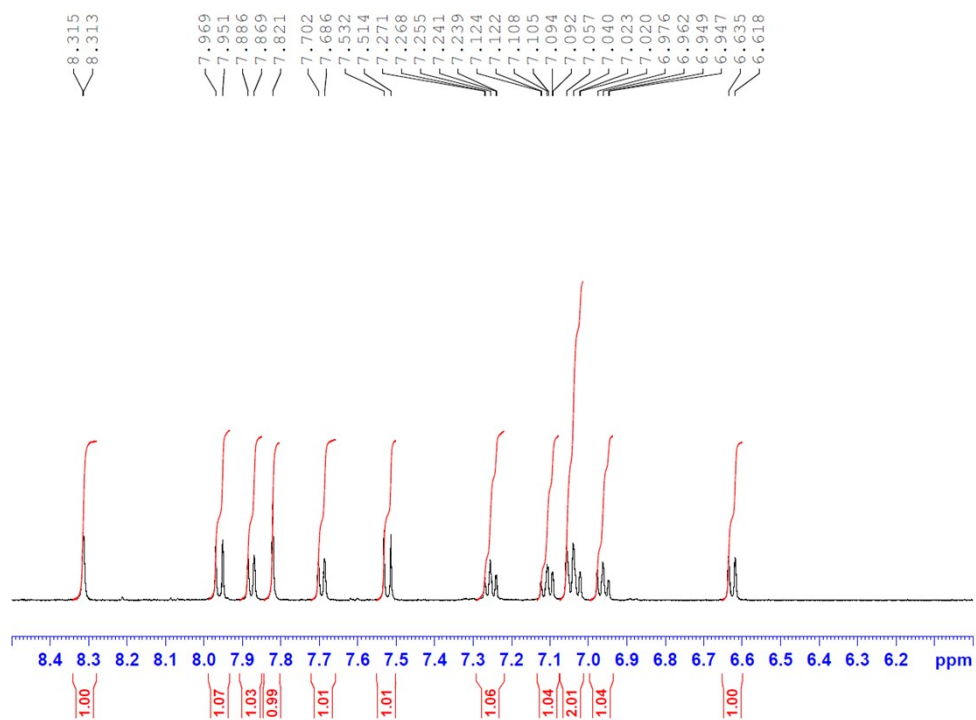

**Figure S2.** (a)  $^1\text{H}$ -NMR spectrum of *S*-Zn (500 MHz,  $d_6$ -DMSO, 298 K,  $\text{Me}_4\text{Si}$ ) and (b) expanded NMR spectrum of *S*-Zn.

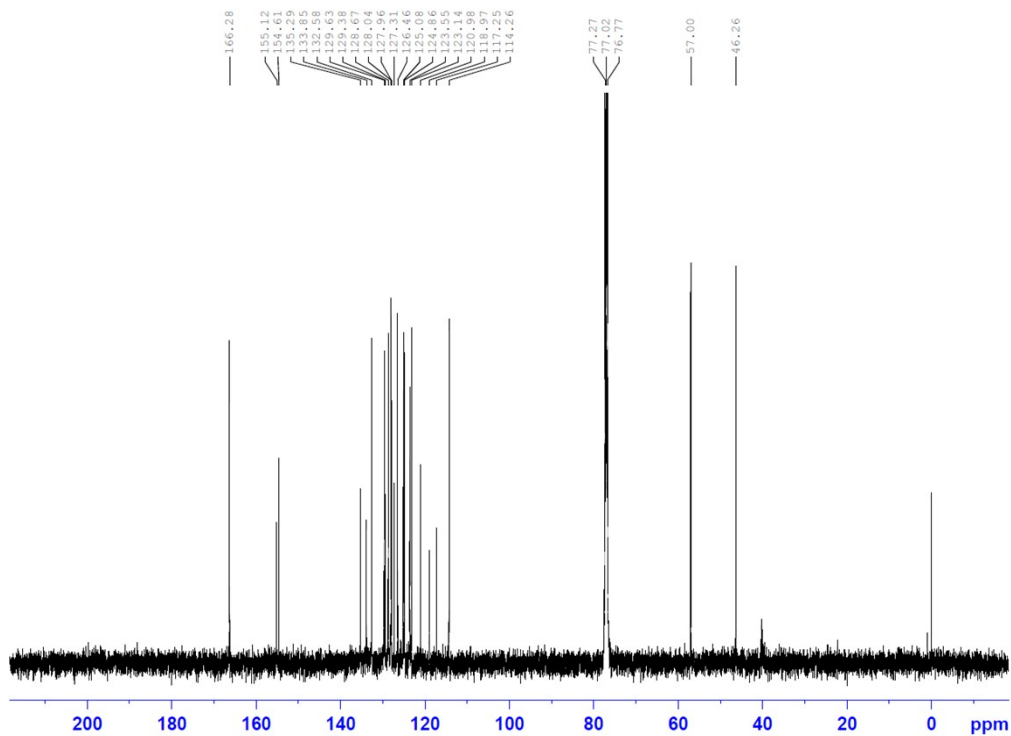

**Figure S3.**  $^{13}\text{C}$ -NMR spectrum of *R*-Zn (500 MHz, *d*-chloroform, 298 K,  $\text{Me}_4\text{Si}$ ).

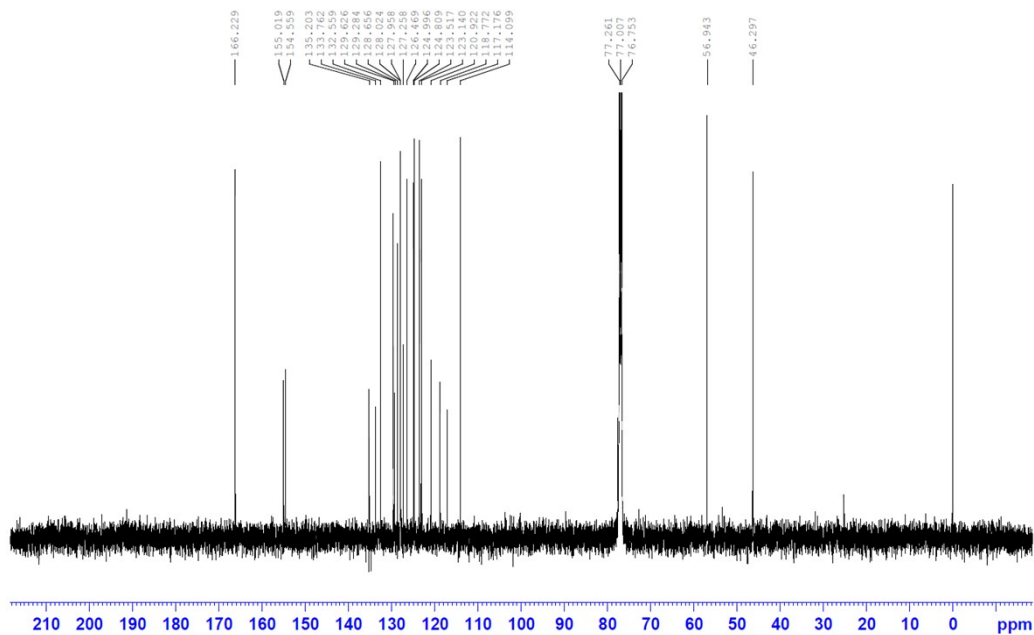

**Figure S4.**  $^{13}\text{C}$ -NMR spectrum of *S*-Zn (500 MHz, *d*-chloroform, 298 K,  $\text{Me}_4\text{Si}$ ).

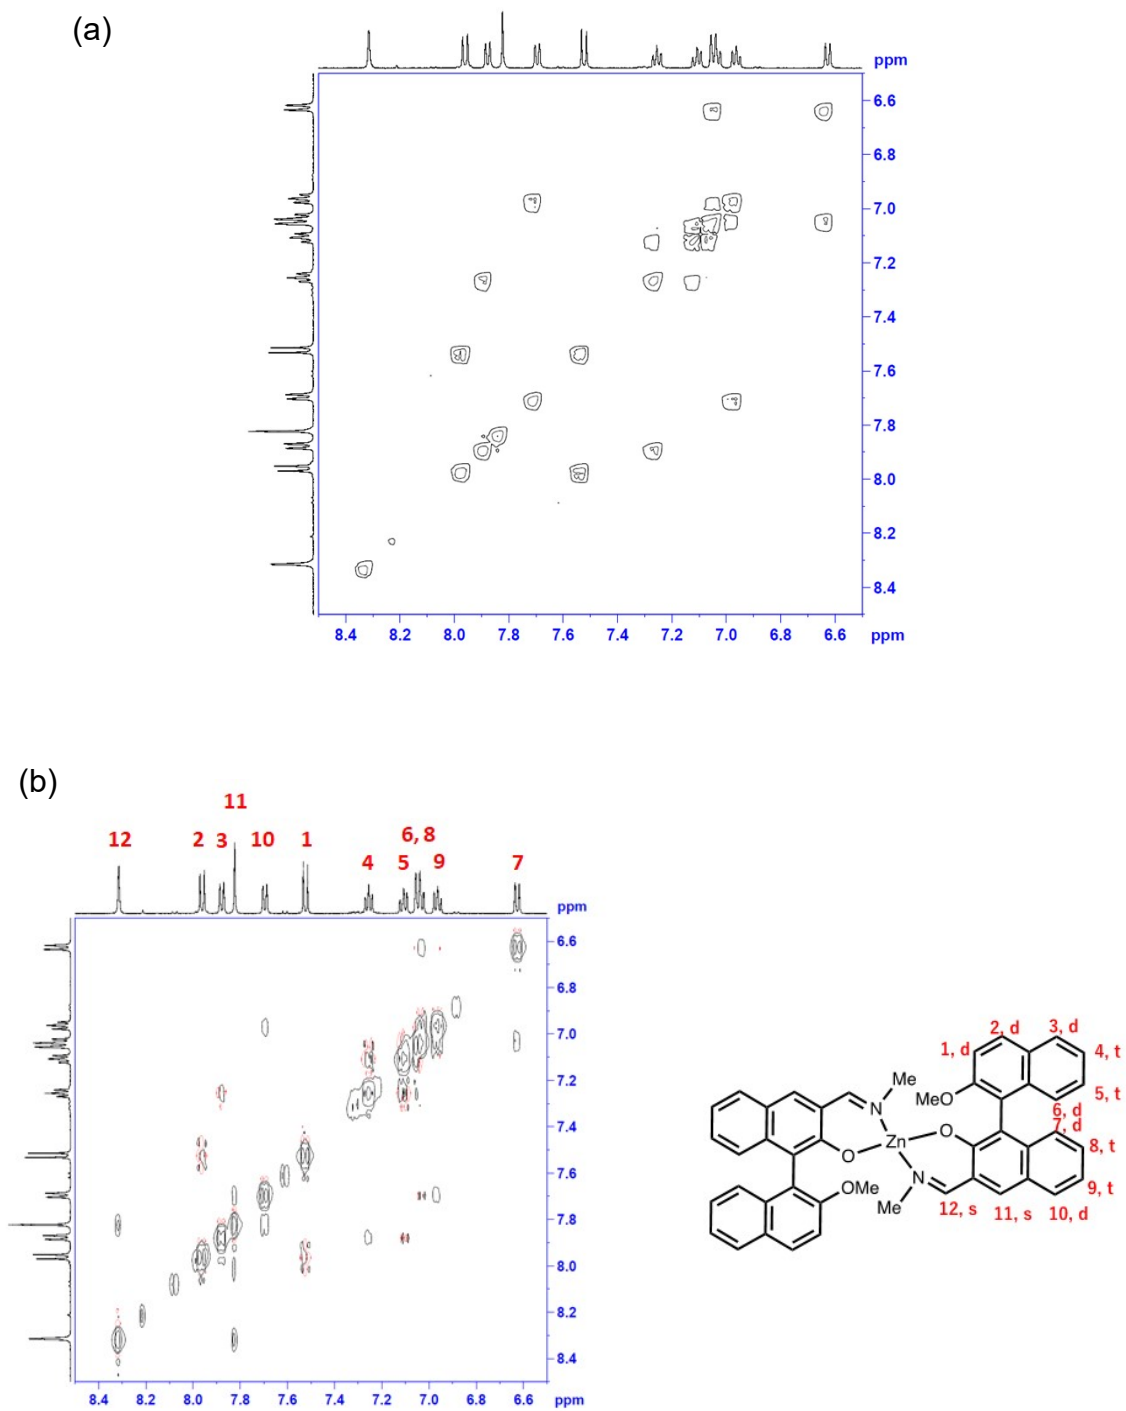

**Figure S5.** (a) COSY and (b) NOESY spectra of *R*-Zn (500 MHz,  $d_6$ -DMSO, 298 K, Me<sub>4</sub>Si).

(a)

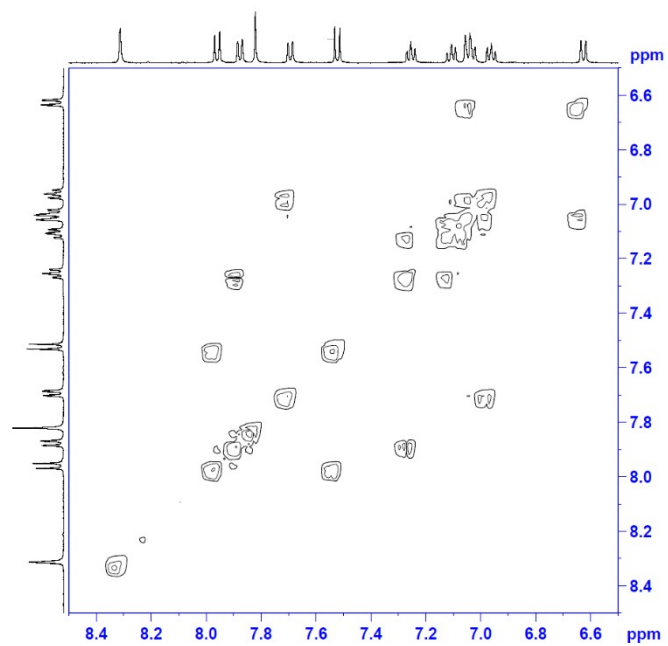

(b)

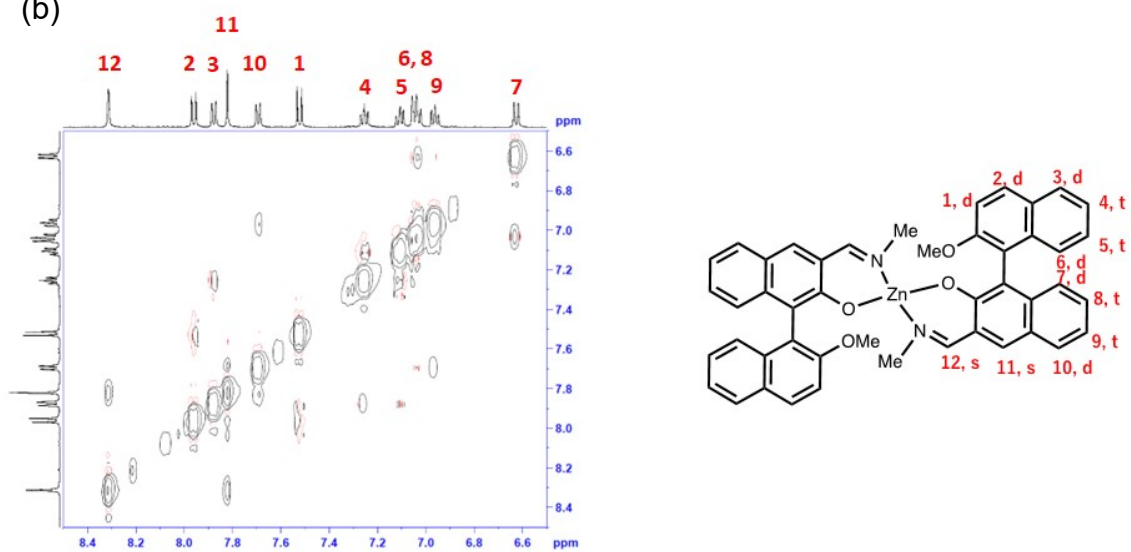

**Figure S6.** (a) COSY and (b) NOESY spectrum of **S-Zn** (500 MHz,  $d_6$ -DMSO, 298 K, Me<sub>4</sub>Si).



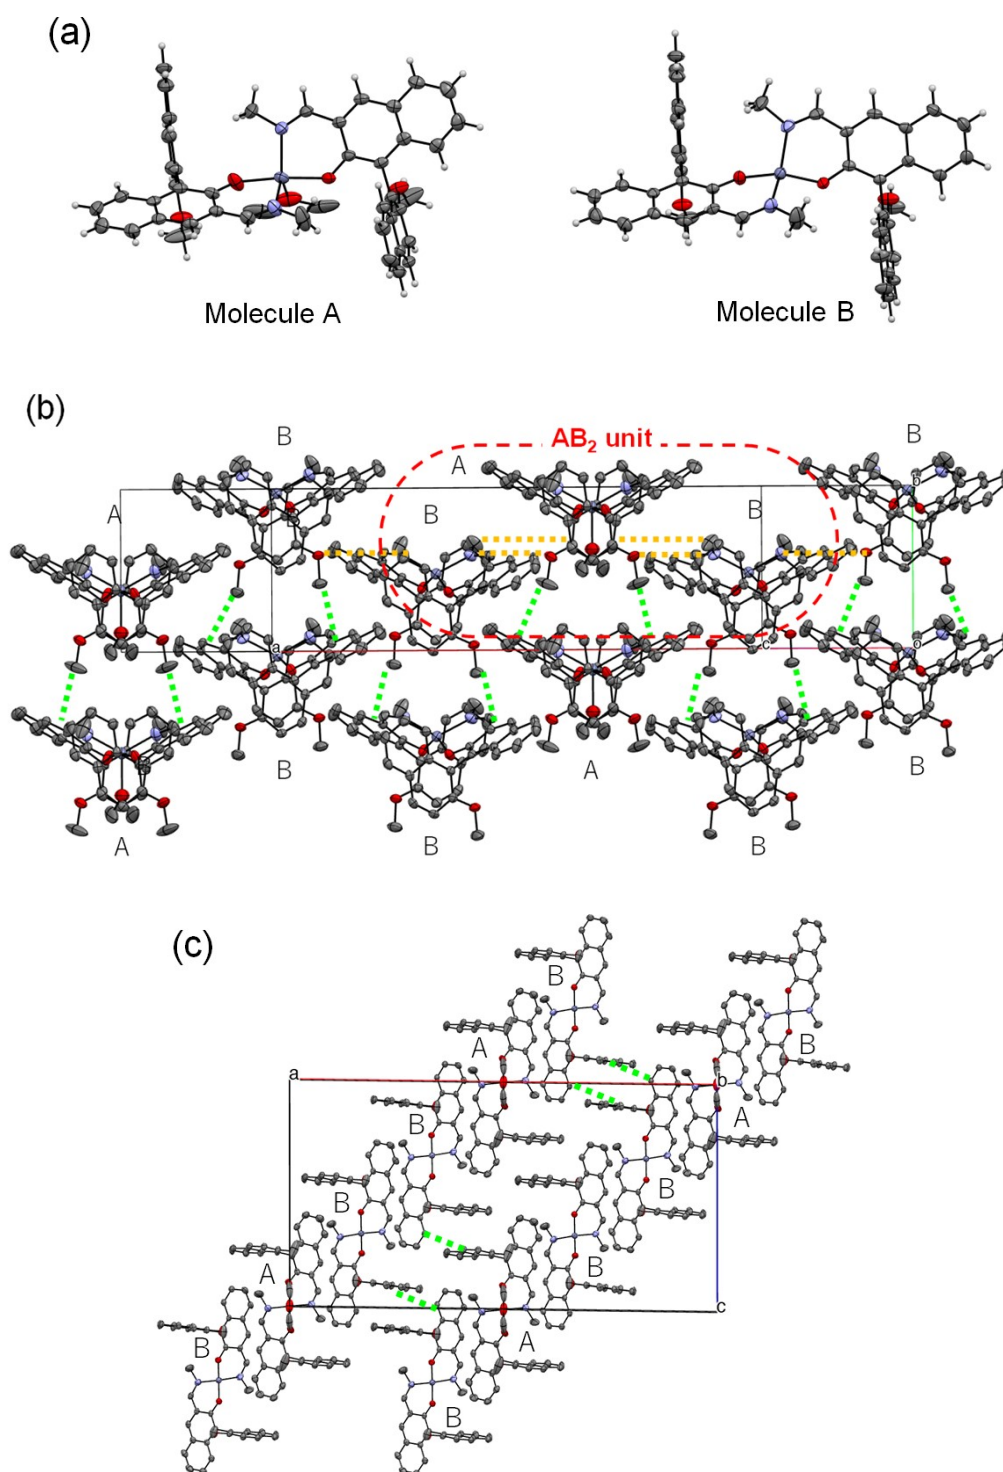

**Figure S7.** Crystal structure of *S-Zn*. (a) Molecular structure of *S-Zn*; Molecule A (left) and molecule B (right); (b) crystal structure of *S-Zn* (green dotted line : CH... $\pi$  interactions, orange dotted line : CH...O interactions); (c) crystal structure of *S-Zn* projected along *b*-axis.

**Table S1.** Crystallographic data for **R-Zn** and **S-Zn**.

|                                                                 | <b>R-Zn</b>                                                                       | <b>S-Zn</b>                                                                       |
|-----------------------------------------------------------------|-----------------------------------------------------------------------------------|-----------------------------------------------------------------------------------|
| Formula                                                         | C <sub>69.5</sub> H <sub>54</sub> N <sub>3</sub> O <sub>8</sub> Zn <sub>1.5</sub> | C <sub>69.5</sub> H <sub>54</sub> N <sub>3</sub> O <sub>8</sub> Zn <sub>1.5</sub> |
| Formula weight                                                  | 1157.21                                                                           | 1157.21                                                                           |
| Color                                                           | Yellow                                                                            | Yellow                                                                            |
| Crystal size/ mm                                                | 0.330 × 0.170 × 0.090                                                             | 0.240 × 0.210 × 0.060                                                             |
| Crystal system                                                  | Monoclinic                                                                        | Monoclinic                                                                        |
| Space group                                                     | C2                                                                                | C2                                                                                |
| <i>a</i> (Å)                                                    | 35.6573(7)                                                                        | 35.7404(7)                                                                        |
| <i>b</i> (Å)                                                    | 8.2326(2)                                                                         | 8.2238(2)                                                                         |
| <i>c</i> (Å)                                                    | 18.9983(4)                                                                        | 18.9816(4)                                                                        |
| $\beta$ / °                                                     | 90.879(2)                                                                         | 90.815(2)                                                                         |
| <i>V</i> (Å <sup>3</sup> )                                      | 5576.3(2)                                                                         | 5578.5(2)                                                                         |
| <i>Z</i>                                                        | 4                                                                                 | 4                                                                                 |
| <i>F</i> (000)                                                  | 2404                                                                              | 2404                                                                              |
| <i>D</i> <sub>calc</sub> (g/cm <sup>3</sup> )                   | 1.378                                                                             | 1.378                                                                             |
| Abs coeff (mm <sup>-1</sup> )                                   | 0.713                                                                             | 0.713                                                                             |
| Flack parameter                                                 | -0.004(3)                                                                         | -0.003(4)                                                                         |
| <i>R</i> <sub>1</sub> <sup>a</sup> ( <i>I</i> > 2σ( <i>I</i> )) | 0.0415                                                                            | 0.0403                                                                            |
| <i>R</i> <sub>w</sub> <sup>b</sup> ( <i>I</i> > 2σ( <i>I</i> )) | 0.0964                                                                            | 0.0952                                                                            |
| <i>R</i> <sub>1</sub> <sup>a</sup> (all data)                   | 0.0484                                                                            | 0.0464                                                                            |
| <i>R</i> <sub>w</sub> <sup>b</sup> (all data)                   | 0.0996                                                                            | 0.0979                                                                            |

$${}^a R_1 = \sum \frac{||F_0| - |F_c||}{\sum |F_0|} \text{ for } I > 2\sigma(I) \text{ data}$$

$${}^b R_w = \left\{ \frac{\sum w (|F_0| - |F_c|)^2}{\sum w |F_0|^2} \right\}^{1/2}$$

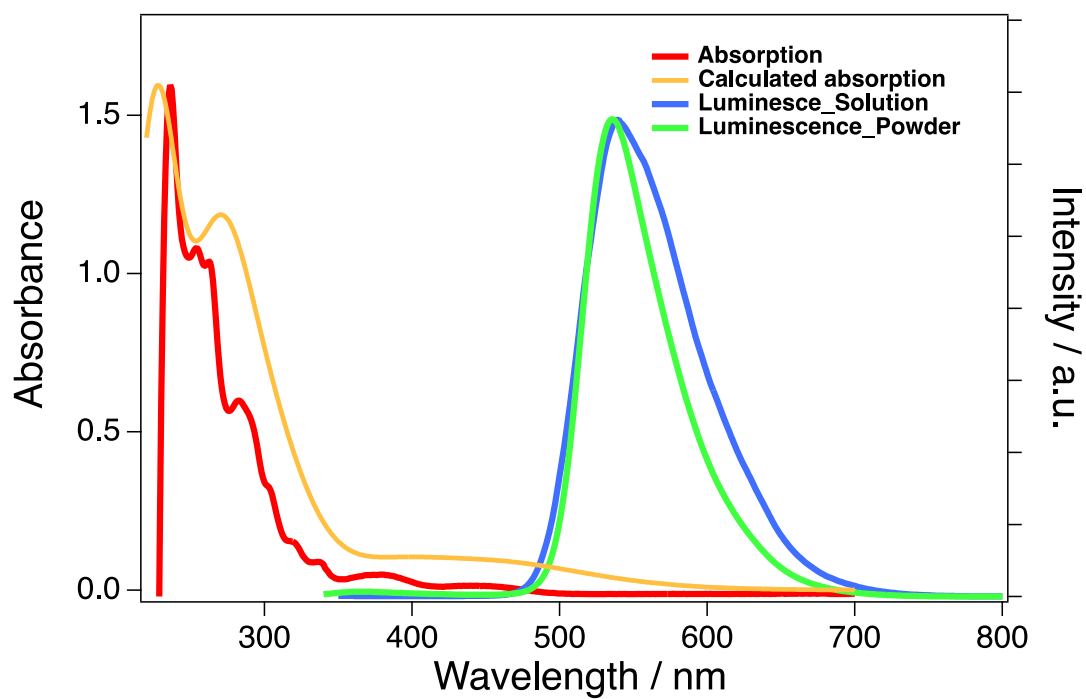

**Figure S8.** Absorption spectrum of **S-Zn** (red,  $1.0 \times 10^{-5}$  M in  $\text{CH}_2\text{Cl}_2$ ), the calculated spectrum (orange), and emission spectra in  $1.0 \times 10^{-4}$  M  $\text{CH}_2\text{Cl}_2$  solution (blue) and in powder (green) excited at 300 nm.

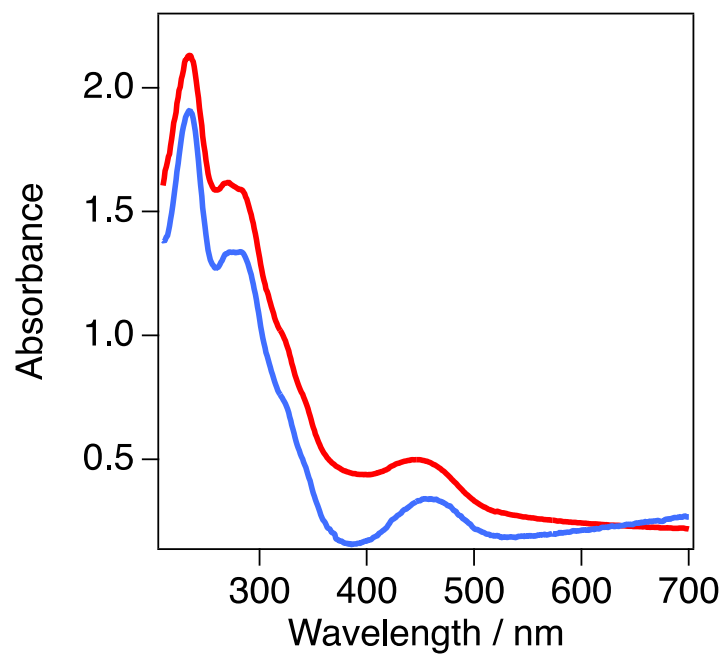

**Figure S9.** Absorption spectra of *R*-Zn(red) and *S*-Zn(blue) in 0.1 wt% KBr pellet.

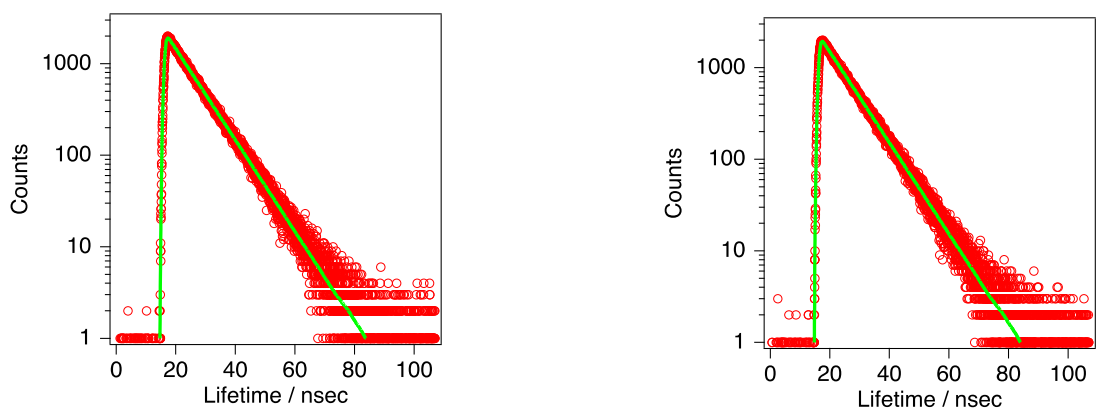

**Figure S10.** Emission decay profiles of *R-Zn* (left) and *S-Zn* (right) in  $\text{CH}_2\text{Cl}_2$  solutions excited at 370 nm and fit (green solid line).

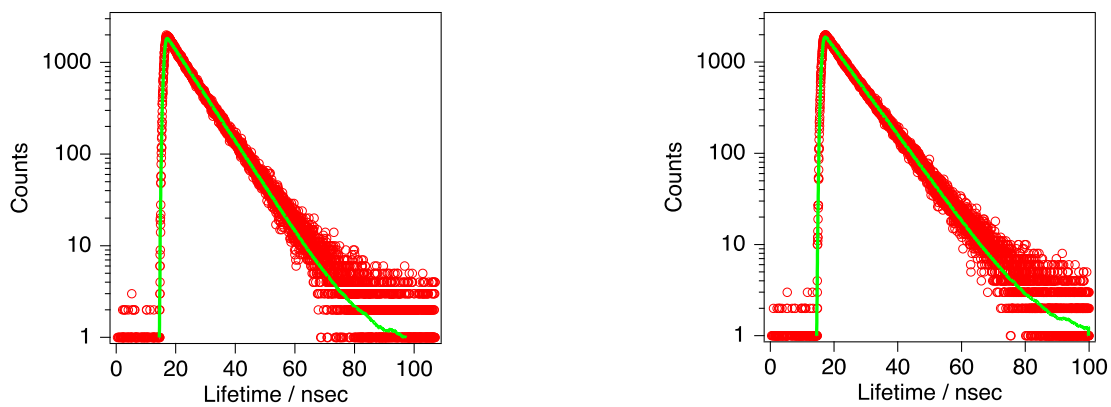

**Figure S11.** Emission decay profiles of *R-Zn* (left) and *S-Zn* (right) in powders excited at 370 nm and fit (green solid line).

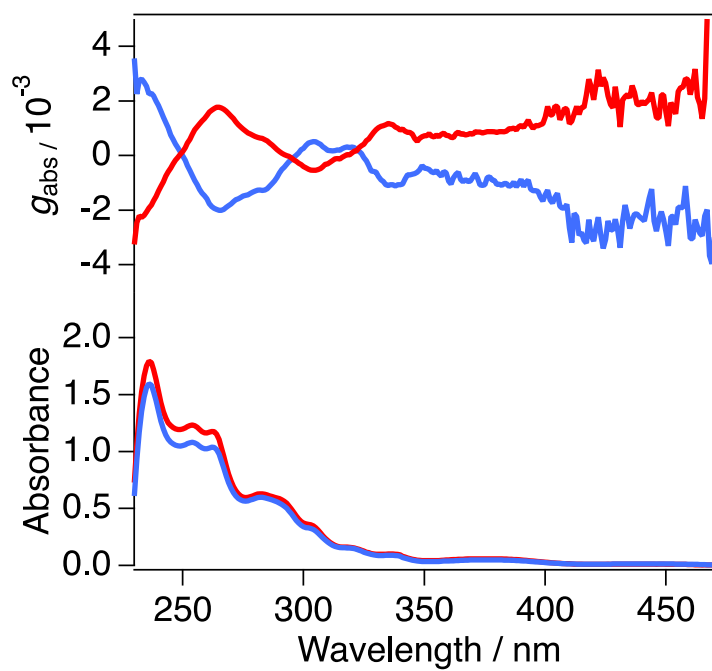

**Figure S12.** CD spectra (upper) and UV-vis spectra (lower) of *R*-Zn (red) and *S*-Zn (blue) in  $10^{-5}$  M  $\text{CH}_2\text{Cl}_2$  solution.

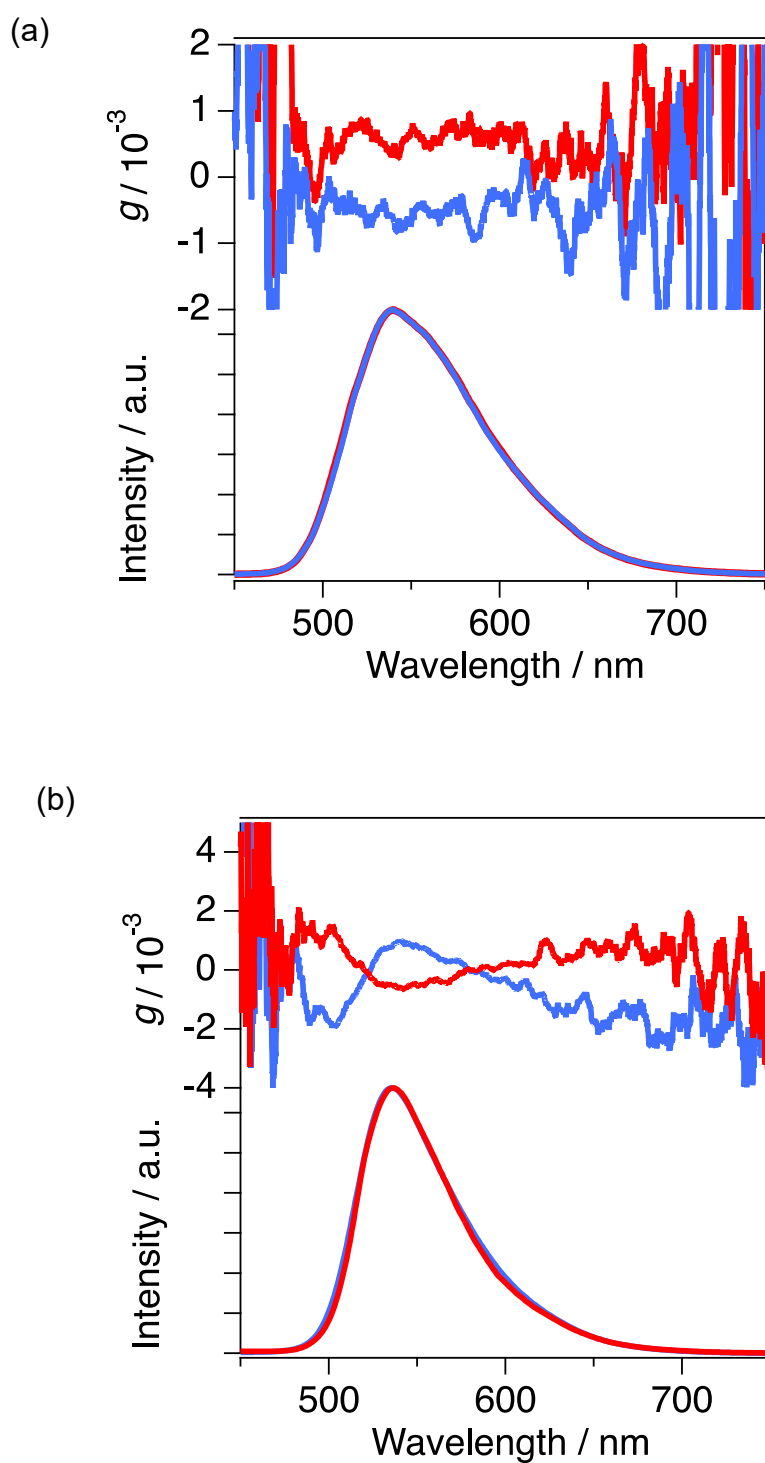

**Figure S13.** (a) CPL spectra (upper) and emission spectra (lower) of ***R-Zn*** (red) and ***S-Zn*** (blue) in  $\text{CH}_2\text{Cl}_2$  solution; (b) CPL spectra (upper) and emission spectra (lower) of ***R-Zn*** (red) and ***S-Zn*** (blue) in powders.

**Table S2.** Spectroscopic data of CH<sub>2</sub>Cl<sub>2</sub> solutions and powder samples of *R-Zn* and *S-Zn*.

|                                  | Sample                                                                                                      | <i>R-Zn</i>            | <i>S-Zn</i>            |
|----------------------------------|-------------------------------------------------------------------------------------------------------------|------------------------|------------------------|
| Quantum yield                    | CH <sub>2</sub> Cl <sub>2</sub> soln. ( $\lambda_{\text{ex}} = 300$ nm)                                     | 11.9%                  | 12.0%                  |
|                                  | Powder ( $\lambda_{\text{ex}} = 300$ nm)                                                                    | 26.2%                  | 25.1%                  |
| Lifetime / ns                    | CH <sub>2</sub> Cl <sub>2</sub> soln.<br>( $\lambda_{\text{ex}} = 300$ nm, $\lambda_{\text{det}} = 540$ nm) | 8.7                    | 8.7                    |
|                                  | Powder<br>( $\lambda_{\text{ex}} = 300$ nm, $\lambda_{\text{det}} = 540$ nm)                                | 8.7                    | 9.1                    |
| $k_f / \text{ns}^{-1}$           | CH <sub>2</sub> Cl <sub>2</sub> solution                                                                    | 0.0137                 | 0.0138                 |
|                                  | Powder                                                                                                      | 0.0301                 | 0.0276                 |
| $k_{\text{nr}} / \text{ns}^{-1}$ | CH <sub>2</sub> Cl <sub>2</sub> solution                                                                    | 0.101                  | 0.101                  |
|                                  | Powder                                                                                                      | 0.0848                 | 0.0823                 |
| $g_{\text{abs}}$                 | CH <sub>2</sub> Cl <sub>2</sub> solution                                                                    | $1.8 \times 10^{-3}$   | $2.0 \times 10^{-3}$   |
| $g_{\text{cpl}}$                 | CH <sub>2</sub> Cl <sub>2</sub> soln. ( $\lambda_{\text{ex}} = 300$ nm)                                     | $0.86 \times 10^{-3}$  | $-0.62 \times 10^{-3}$ |
|                                  | Powder ( $\lambda_{\text{ex}} = 300$ nm)                                                                    | $-0.84 \times 10^{-3}$ | $1.0 \times 10^{-3}$   |

$$k_f = \Phi/\tau, k_{\text{nr}} = (1-\Phi)/\tau$$



(a)

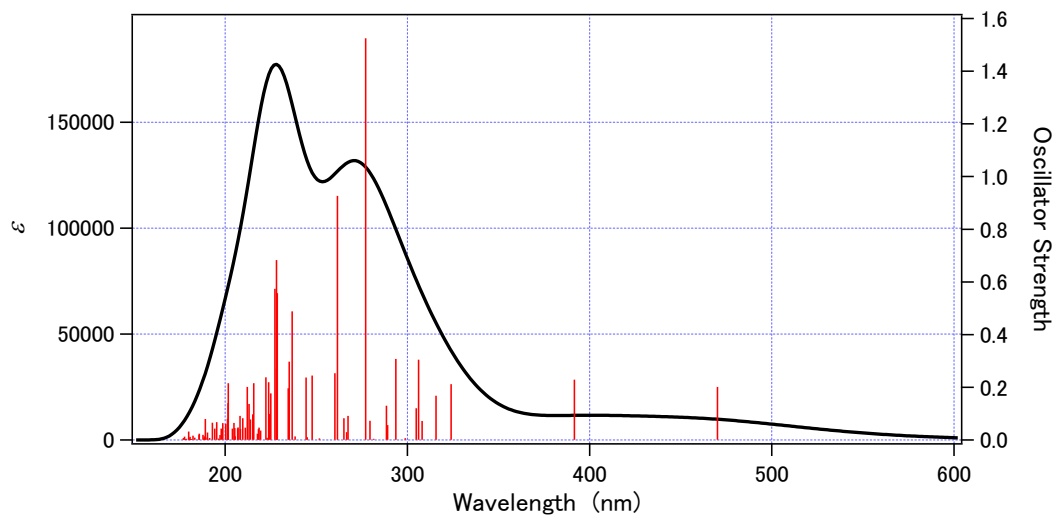

(b)

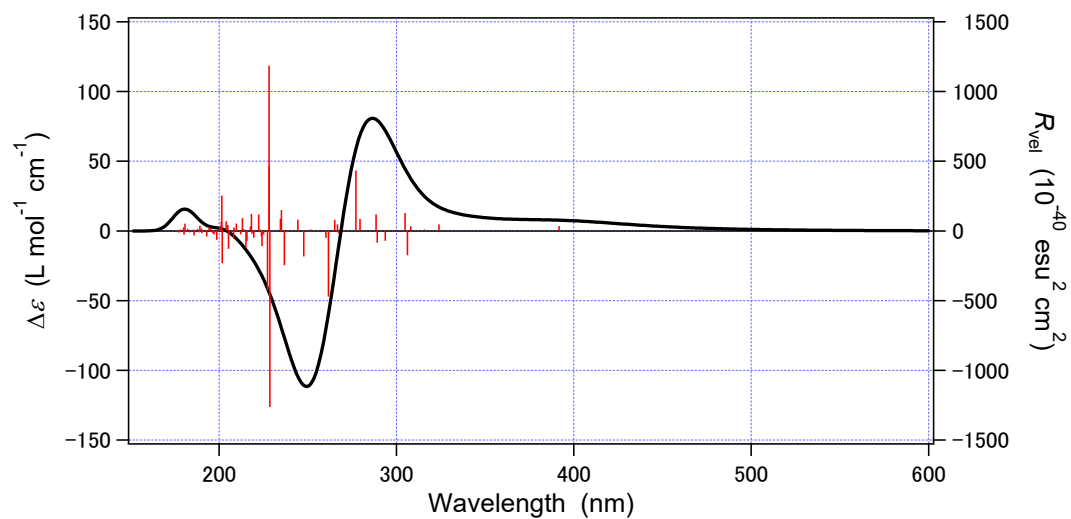

**Figure S14.** Simulated (a) UV-vis and (b) CD spectra of *R-Zn* from TD-DFT calculations.

**Table S3.** Selected excitation energies and main weights of transition for **R-Zn** calculated by TD-DFT method.

| Excited state | Experiment (nm) | Excitation Energy (nm)<br>(Oscillator strength, $R_{\text{vel}}$ ) | Transitions (% weight)                                 |
|---------------|-----------------|--------------------------------------------------------------------|--------------------------------------------------------|
| 1             | 430-473 (broad) | 470 (0.2013, 5.2199)                                               | 194 → 195 (47.9)                                       |
| 2             | 379             | 392 (0.2292, 35.0748)                                              | 193 → 196 (46.5)                                       |
| 14            | 282             | 277 (1.5248, 433.2627)                                             | 194 → 200 (30.2)<br>194 → 199 (7.5)<br>189 → 195 (4.9) |
| 18            | 250-263         | 262 (0.9268, -470.5516)                                            | 193 → 199 (22.1)<br>190 → 196 (6.1)<br>193 → 200 (4.4) |
| 30            | 236             | 228 (0.6831, 1186.6658)                                            | 191 → 201 (10.6)<br>190 → 195 (6.2)<br>193 → 201 (5.6) |

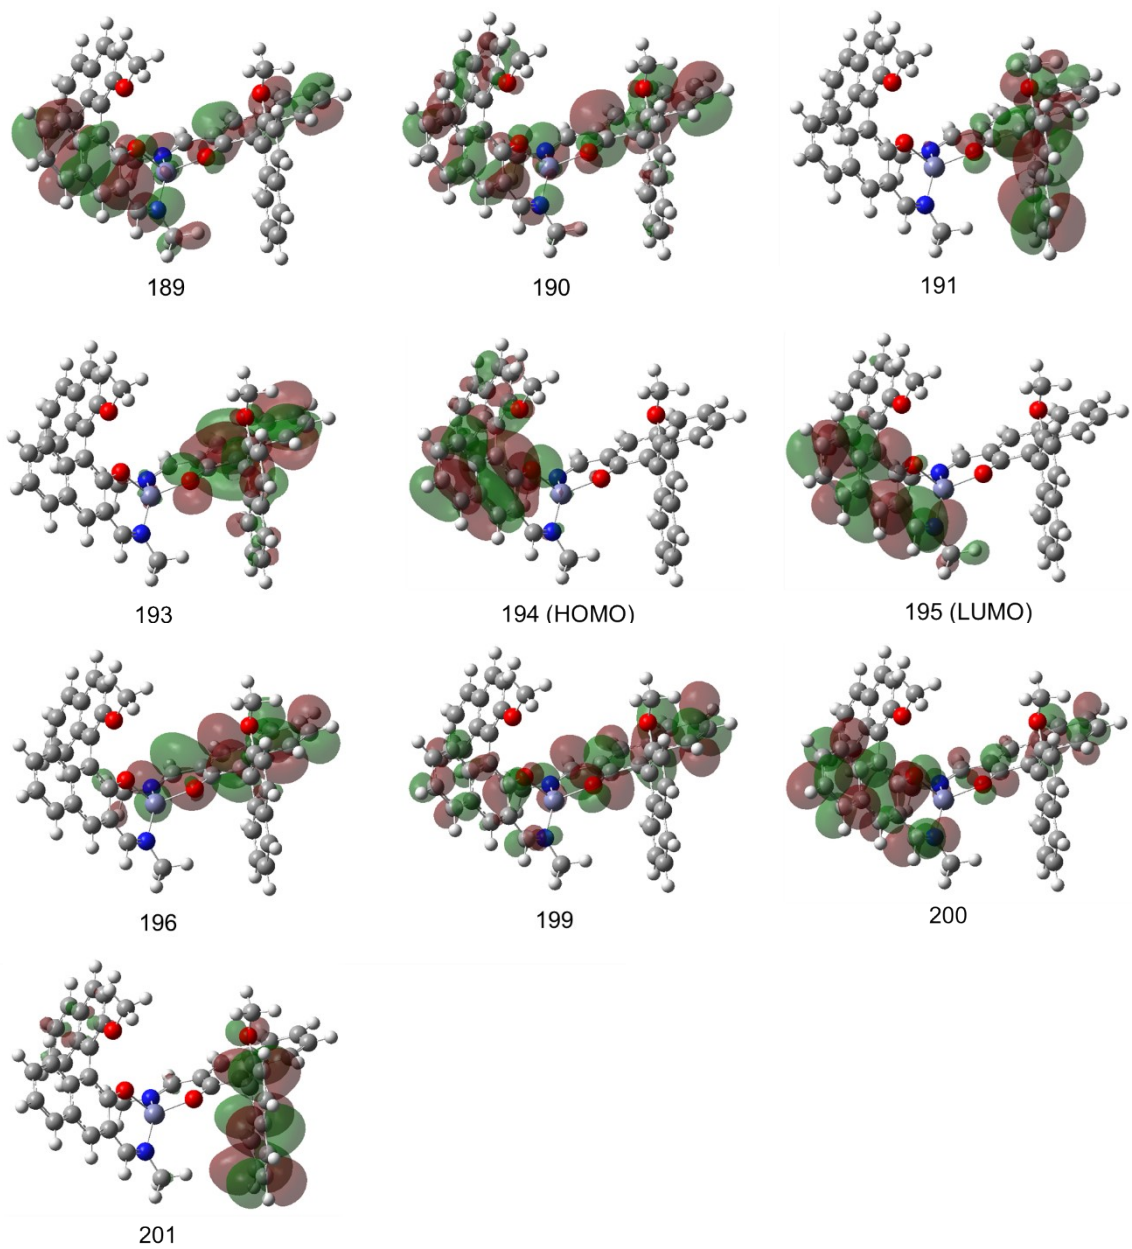

**Figure S15.** Molecular orbitals of *R-Zn* related to the excitation listed in Table S3.

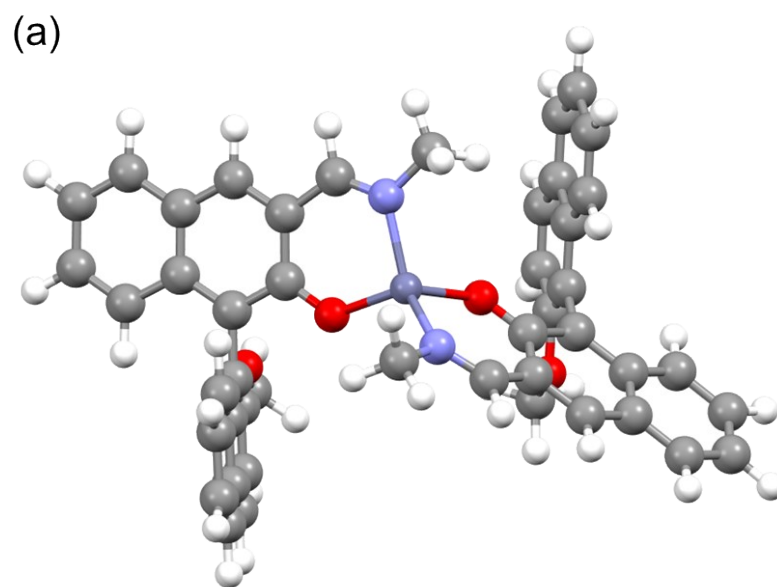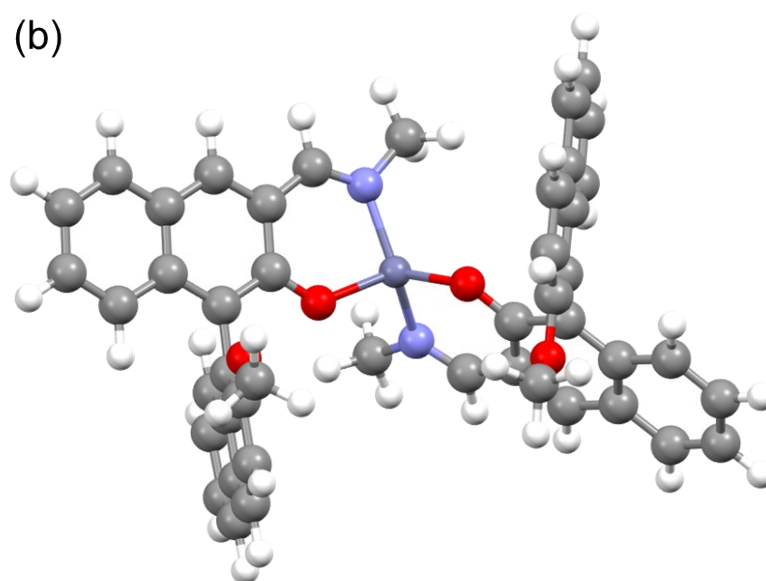

**Figure S16.** Optimized molecular structures of (a) *R*-Zn and (b) *S*-Zn

**Table S4.** Cartesian coordinates of the optimized equilibrium structure of **R-Zn** calculated by DFT method (total energy: -3961.78619128 a.u.).

| Atom | x         | y         | z         |
|------|-----------|-----------|-----------|
| Zn   | 0.020188  | -0.121184 | -1.872875 |
| O    | 1.561358  | -0.167426 | -0.724837 |
| O    | 3.222343  | 0.263139  | 2.901076  |
| N    | 0.345237  | 1.743876  | -2.548143 |
| C    | -0.628784 | 2.354383  | -3.430651 |
| H    | -1.607473 | 2.385132  | -2.9291   |
| H    | -0.34237  | 3.378519  | -3.718545 |
| H    | -0.740699 | 1.742727  | -4.339079 |
| C    | 1.37007   | 2.417906  | -2.177283 |
| H    | 1.474662  | 3.444439  | -2.564108 |
| C    | 2.446732  | 1.998552  | -1.295496 |
| C    | 3.468216  | 2.919066  | -1.118727 |
| H    | 3.406003  | 3.883208  | -1.630896 |
| C    | 4.583844  | 2.65616   | -0.307534 |
| C    | 5.629775  | 3.608687  | -0.142268 |
| H    | 5.54558   | 4.566907  | -0.661671 |
| C    | 6.714113  | 3.332313  | 0.645193  |
| H    | 7.513799  | 4.065451  | 0.769093  |
| C    | 6.796706  | 2.075568  | 1.302659  |
| H    | 7.666574  | 1.853706  | 1.925885  |
| C    | 5.806748  | 1.139162  | 1.165977  |
| H    | 5.891269  | 0.178675  | 1.675223  |
| C    | 4.655637  | 1.392414  | 0.358345  |
| C    | 3.612559  | 0.449079  | 0.200529  |
| C    | 2.495598  | 0.71871   | -0.614134 |
| C    | 3.648697  | -0.861842 | 0.903498  |
| C    | 3.873576  | -2.07584  | 0.190656  |
| C    | 4.105629  | -2.092701 | -1.21472  |

|   |           |           |           |
|---|-----------|-----------|-----------|
| H | 4.119142  | -1.145711 | -1.754861 |
| C | 4.310783  | -3.271028 | -1.88564  |
| H | 4.487477  | -3.258394 | -2.963854 |
| C | 4.299211  | -4.5084   | -1.193929 |
| H | 4.462633  | -5.439216 | -1.741486 |
| C | 4.08685   | -4.527399 | 0.159743  |
| H | 4.078449  | -5.472194 | 0.709253  |
| C | 3.870851  | -3.322178 | 0.883013  |
| C | 3.650996  | -3.323195 | 2.281547  |
| H | 3.648782  | -4.27571  | 2.81679   |
| C | 3.440867  | -2.153559 | 2.965291  |
| H | 3.270952  | -2.181262 | 4.040797  |
| C | 3.434631  | -0.915284 | 2.273514  |
| C | 3.016598  | 0.291627  | 4.2921    |
| H | 2.876381  | 1.345752  | 4.564122  |
| H | 2.115898  | -0.272325 | 4.587504  |
| H | 3.885248  | -0.103114 | 4.84548   |
| O | -1.640661 | 0.046028  | -0.77995  |
| O | -3.241399 | -0.209853 | 2.9037    |
| N | -0.494022 | -1.848341 | -2.644218 |
| C | 0.413397  | -2.519687 | -3.546784 |
| H | 1.397349  | -2.670283 | -3.070321 |
| H | 0.030314  | -3.50586  | -3.858316 |
| H | 0.583514  | -1.916397 | -4.454988 |
| C | -1.576919 | -2.488323 | -2.250153 |
| H | -1.73344  | -3.494254 | -2.668759 |
| C | -2.591428 | -2.069702 | -1.349163 |
| C | -3.659904 | -2.928408 | -1.070482 |
| H | -3.678504 | -3.909952 | -1.552602 |
| C | -4.734003 | -2.607082 | -0.197846 |
| C | -5.789255 | -3.502637 | 0.045211  |

|   |           |           |           |
|---|-----------|-----------|-----------|
| H | -5.773111 | -4.482617 | -0.437447 |
| C | -6.851368 | -3.157264 | 0.885069  |
| H | -7.656515 | -3.87684  | 1.052383  |
| C | -6.89484  | -1.90607  | 1.501336  |
| H | -7.730914 | -1.635092 | 2.148137  |
| C | -5.855368 | -0.998381 | 1.27769   |
| H | -5.886393 | -0.014019 | 1.746578  |
| C | -4.765648 | -1.323122 | 0.455037  |
| C | -3.681685 | -0.425014 | 0.216414  |
| C | -2.595277 | -0.775771 | -0.656259 |
| C | -3.608961 | 0.89147   | 0.881178  |
| C | -3.743072 | 2.102355  | 0.134151  |
| C | -4.046464 | 2.103306  | -1.256104 |
| H | -4.191475 | 1.150199  | -1.76667  |
| C | -4.167923 | 3.278221  | -1.954685 |
| H | -4.403218 | 3.25292   | -3.021229 |
| C | -3.998309 | 4.525381  | -1.305206 |
| H | -4.094631 | 5.452678  | -1.874016 |
| C | -3.727408 | 4.559814  | 0.038299  |
| H | -3.606946 | 5.513493  | 0.558285  |
| C | -3.601838 | 3.359703  | 0.789412  |
| C | -3.348859 | 3.377804  | 2.182626  |
| H | -3.238175 | 4.34049   | 2.687117  |
| C | -3.244686 | 2.214334  | 2.900879  |
| H | -3.04597  | 2.256765  | 3.970727  |
| C | -3.372774 | 0.961675  | 2.250943  |
| C | -3.018282 | -0.223533 | 4.29457   |
| H | -2.968931 | -1.279353 | 4.589283  |
| H | -2.066094 | 0.264148  | 4.561118  |
| H | -3.840603 | 0.261435  | 4.846119  |

**Table S5.** Cartesian coordinates of the optimized equilibrium structure of **S-Zn** calculated by DFT method (total energy: -3961.78619127 a.u.).

| Atom | x         | y         | z         |
|------|-----------|-----------|-----------|
| Zn   | 0.020167  | 0.121169  | -1.872797 |
| O    | -1.640692 | -0.046026 | -0.779882 |
| O    | 1.561344  | 0.167374  | -0.724762 |
| O    | -3.241457 | 0.209783  | 2.90376   |
| O    | 3.22259   | -0.26312  | 2.901065  |
| N    | 0.345185  | -1.743897 | -2.548069 |
| N    | -0.494013 | 1.848341  | -2.644126 |
| C    | 3.441119  | 2.153579  | 2.965218  |
| H    | 3.271287  | 2.181302  | 4.040737  |
| C    | 3.651191  | 3.323204  | 2.281438  |
| H    | 3.649018  | 4.275728  | 2.816663  |
| C    | 3.870939  | 3.322161  | 0.882887  |
| C    | 4.086879  | 4.527369  | 0.159578  |
| H    | 4.078518  | 5.472174  | 0.709073  |
| C    | 4.299138  | 4.508347  | -1.19411  |
| H    | 4.462515  | 5.439154  | -1.741695 |
| C    | 4.310662  | 3.270963  | -1.885798 |
| H    | 4.487276  | 3.258309  | -2.964025 |
| C    | 4.105561  | 2.092647  | -1.214842 |
| H    | 4.119035  | 1.145647  | -1.754967 |
| C    | 3.873613  | 2.07581   | 0.190552  |
| C    | 3.648789  | 0.861824  | 0.903433  |
| C    | 3.434829  | 0.915291  | 2.273465  |
| C    | 3.016989  | -0.291587 | 4.292111  |
| H    | 2.876801  | -1.345708 | 4.564163  |
| H    | 3.885697  | 0.103163  | 4.845394  |
| H    | 2.116319  | 0.272369  | 4.587601  |
| C    | 3.612605  | -0.44911  | 0.200488  |
| C    | 4.65569   | -1.392446 | 0.358261  |



|   |           |           |           |
|---|-----------|-----------|-----------|
| C | 5.806845  | -1.139187 | 1.165829  |
| H | 5.891398  | -0.178692 | 1.675054  |
| C | 6.796804  | -2.075596 | 1.302475  |
| H | 7.666706  | -1.853729 | 1.925654  |
| C | 6.714171  | -3.332351 | 0.645034  |
| H | 7.513859  | -4.065492 | 0.768907  |
| C | 5.629793  | -3.60873  | -0.142369 |
| H | 5.545566  | -4.566957 | -0.661755 |
| C | 4.583859  | -2.6562   | -0.307598 |
| C | 3.468194  | -2.91911  | -1.11874  |
| H | 3.405958  | -3.883254 | -1.630901 |
| C | 2.446706  | -1.998594 | -1.29547  |
| C | 2.495599  | -0.718751 | -0.614111 |
| C | 1.370014  | -2.417941 | -2.177223 |
| H | 1.474581  | -3.444479 | -2.564042 |
| C | -0.628863 | -2.354396 | -3.430553 |
| H | -0.740789 | -1.742742 | -4.338981 |
| H | -0.342468 | -3.378536 | -3.718449 |
| H | -1.607542 | -2.38513  | -2.928982 |
| C | -1.576884 | 2.488351  | -2.250036 |
| H | -1.733374 | 3.494297  | -2.668619 |
| C | -2.591401 | 2.069743  | -1.34905  |
| C | -3.659849 | 2.928477  | -1.070346 |
| H | -3.678415 | 3.910035  | -1.552438 |
| C | -4.73396  | 2.607159  | -0.197724 |
| C | -5.789185 | 3.502742  | 0.045356  |
| H | -5.773006 | 4.482737  | -0.437271 |
| C | -6.851314 | 3.157376  | 0.885196  |
| H | -7.656439 | 3.876973  | 1.052528  |
| C | -6.894832 | 1.906164  | 1.501421  |
| H | -7.730919 | 1.635191  | 2.148207  |
| C | -5.855388 | 0.998448  | 1.277753  |

|   |           |           |           |
|---|-----------|-----------|-----------|
| H | -5.886449 | 0.014071  | 1.746609  |
| C | -4.76565  | 1.32318   | 0.455119  |
| C | -3.681714 | 0.425045  | 0.216476  |
| C | -2.595289 | 0.775795  | -0.656179 |
| C | -3.60904  | -0.891461 | 0.8812    |
| C | -3.372872 | -0.961719 | 2.250965  |
| C | -3.743192 | -2.102317 | 0.134133  |
| C | -4.046568 | -2.103212 | -1.256126 |
| H | -4.191533 | -1.150083 | -1.766663 |
| C | -4.168068 | -3.2781   | -1.954745 |
| H | -4.403349 | -3.252756 | -3.021291 |
| C | -3.998513 | -4.525288 | -1.305303 |
| H | -4.094867 | -5.452563 | -1.874143 |
| C | -3.727629 | -4.559774 | 0.038204  |
| H | -3.607213 | -5.513474 | 0.558161  |
| C | -3.602017 | -3.359692 | 0.789356  |
| C | -3.349056 | -3.377847 | 2.182572  |
| H | -3.238418 | -4.340552 | 2.687035  |
| C | -3.244843 | -2.214404 | 2.900863  |
| H | -3.046143 | -2.256877 | 3.970712  |
| C | -3.018369 | 0.22341   | 4.294635  |
| H | -2.968977 | 1.279219  | 4.589383  |
| H | -3.840723 | -0.261539 | 4.846151  |
| H | -2.066209 | -0.264322 | 4.561189  |
| C | 0.413427  | 2.519681  | -3.546676 |
| H | 0.583552  | 1.916392  | -4.454878 |
| H | 0.030357  | 3.505858  | -3.858212 |
| H | 1.397372  | 2.670269  | -3.070197 |
